# Supplementary material for: Ovule Transcriptome Analysis Discloses Deregulation of Genes and Pathways in Sexual and Apomictic Limonium Species (Plumbaginaceae)
Source: MDPI journal article supplement (doi:10.3390/genes14040901), 2023-04-12
Supplement: s1 [file s1]

**Table S8.** Uniquely annotated top down- and up-regulate differentially expressed genes (DEGs) in ovules from sexual *Limonium* plants, namely *L. ovalifolium* (O) relative to the control *L. auriculifolium* (a) in either S1 (1), S2 (2) or S3/S4 (4) stages. DEGs were annotated according to the *Arabidopsis thaliana* reference genome and are presented in ascending order of log<sub>2</sub> fold-change (Log<sub>2</sub>FC).

| Gene ID                | Gene Name        | Protein Name                                                                 | Molecular Function                                       | Log <sub>2</sub> FC |
|------------------------|------------------|------------------------------------------------------------------------------|----------------------------------------------------------|---------------------|
| <b>O1a1</b>            |                  |                                                                              |                                                          |                     |
| <b>Down</b>            |                  |                                                                              |                                                          |                     |
| TRINITY_DN5904_c0_g1   | <i>AT4G00165</i> | Putative lipid-binding protein At4g00165                                     |                                                          | -6.76               |
| TRINITY_DN604_c0_g1    | <i>AT5G45950</i> | GDSL esterase/lipase At5g45950                                               | hydrolase activity                                       | -6.22               |
| TRINITY_DN14059_c0_g1  | <i>AT4G28780</i> | GDSL esterase/lipase At4g28780                                               | hydrolase activity                                       | -5.28               |
| TRINITY_DN1473_c0_g1   | <i>PRE6</i>      | Transcription factor PRE6                                                    | protein binding                                          | -5.27               |
| TRINITY_DN8238_c0_g2   | <i>AT3G03770</i> | Probable inactive leucine-rich repeat receptor-like protein kinase At3g03770 | ATP binding; transferase activity                        | -5.05               |
| TRINITY_DN8876_c0_g1   | <i>AT2G27360</i> | GDSL esterase/lipase At2g27360                                               | hydrolase activity                                       | -5.05               |
| TRINITY_DN150733_c0_g1 | <i>TBL31</i>     | Protein trichome birefringence-like 31                                       | transferase activity                                     | -4.66               |
| TRINITY_DN4747_c0_g1   | <i>EXPB3</i>     | Expansin-B3                                                                  |                                                          | -4.65               |
| TRINITY_DN664_c0_g1    | <i>FACT</i>      | Fatty alcohol:caffeoyl-CoA acyltransferase                                   | transferase activity                                     | -4.57               |
| TRINITY_DN17512_c0_g1  | <i>RRA3</i>      | Arabinosyltransferase RRA3                                                   | transferase activity                                     | -4.29               |
| <b>Up</b>              |                  |                                                                              |                                                          |                     |
| TRINITY_DN6156_c0_g1   | <i>PKSA</i>      | Type III polyketide synthase A                                               | transferase activity                                     | 3.17                |
| TRINITY_DN6357_c0_g1   | <i>PR5K</i>      | PR5-like receptor kinase                                                     | ATP binding; transferase activity                        | 3.34                |
| TRINITY_DN4573_c0_g2   | <i>AT5G63180</i> | Probable pectate lyase 22                                                    | metal ion binding; lyase activity                        | 3.65                |
| TRINITY_DN31379_c0_g1  | <i>TKPR1</i>     | Tetraketide alpha-pyrone reductase 1                                         | oxidoreductase activity                                  | 3.87                |
| TRINITY_DN6293_c0_g2   | <i>CYP703A2</i>  | Cytochrome P450 703A2                                                        | oxidoreductase activity; heme binding; metal ion binding | 3.88                |
| TRINITY_DN4485_c0_g1   | <i>CYP704B1</i>  | Cytochrome P450 704B1                                                        | oxidoreductase activity; heme binding; metal ion binding | 4.24                |

|                       |                  |                                              |                                   |      |
|-----------------------|------------------|----------------------------------------------|-----------------------------------|------|
| TRINITY_DN13122_c1_g1 | <i>AT5G03980</i> | GDSL esterase/lipase At5g03980               | hydrolase activity                | 4.27 |
| TRINITY_DN2985_c0_g1  | <i>GRDP2</i>     | Glycine-rich domain-containing protein 2     |                                   | 4.67 |
| TRINITY_DN9952_c0_g1  | <i>ABCG26</i>    | ABC transporter G family member 26           | ATP binding; transporter activity | 4.80 |
| TRINITY_DN6869_c0_g1  | <i>A6</i>        | Probable glucan endo-1,3-beta-glucosidase A6 | hydrolase activity                | 4.96 |

## O2a2

### Down

|                        |               |                                                                |                                                                            |       |
|------------------------|---------------|----------------------------------------------------------------|----------------------------------------------------------------------------|-------|
| TRINITY_DN5157_c0_g3   | <i>PSBC</i>   | Photosystem II CP43 reaction center protein                    | chlorophyll binding; oxidoreductase activity; ion binding; RNA binding     | -6.28 |
| TRINITY_DN1806_c0_g2   | <i>NDHH</i>   | NAD(P)H-quinone oxidoreductase subunit H, chloroplastic        | NAD binding; oxidoreductase activity                                       | -6.19 |
| TRINITY_DN5664_c0_g1   | <i>ATPA</i>   | ATP synthase subunit alpha, chloroplastic                      | ADP binding; ATP binding; RNA binding; ATP-dependent activity; ion binding | -6.06 |
| TRINITY_DN47860_c0_g2  | <i>PSBE</i>   | Cytochrome b559 subunit alpha                                  | oxidoreductase activity; heme binding; ion binding                         | -5.19 |
| TRINITY_DN2730_c0_g1   | <i>CLPP1</i>  | Chloroplastic ATP-dependent Clp protease proteolytic subunit 1 | enzyme binding; ATP-dependent activity; hydrolase activity                 | -5.16 |
| TRINITY_DN13463_c1_g4  | <i>RBCL</i>   | Ribulose biphosphate carboxylase large chain                   | ion binding; oxidoreductase activity; RNA binding; lyase activity          | -4.61 |
| TRINITY_DN51734_c0_g2  | <i>LTP11</i>  | Non-specific lipid-transfer protein 11                         | lipid binding                                                              | -4.52 |
| TRINITY_DN166189_c1_g1 | <i>LTP1</i>   | Non-specific lipid-transfer protein 1                          | protein binding; lipid binding                                             | -4.50 |
| TRINITY_DN3643_c2_g1   | <i>YCF3</i>   | Photosystem I assembly protein Ycf3                            |                                                                            | -4.37 |
| TRINITY_DN10964_c0_g1  | <i>GRXC13</i> | Glutaredoxin-C13                                               | oxidoreductase activity                                                    | -3.87 |

### Up

|                       |                  |                                       |                    |      |
|-----------------------|------------------|---------------------------------------|--------------------|------|
| TRINITY_DN604_c0_g1   | <i>AT5G45950</i> | GDSL esterase/lipase At5g45950        | hydrolase activity | 4.72 |
| TRINITY_DN19440_c0_g1 | <i>PELPK1</i>    | Protein PELPK1                        |                    | 4.77 |
| TRINITY_DN8876_c0_g1  | <i>AT2G27360</i> | GDSL esterase/lipase At2g27360        | hydrolase activity | 5.04 |
| TRINITY_DN7672_c0_g1  | <i>LTP6</i>      | Non-specific lipid-transfer protein 6 | lipid binding      | 5.10 |

|                       |                  |                                                  |                      |      |
|-----------------------|------------------|--------------------------------------------------|----------------------|------|
| TRINITY_DN11184_c0_g1 | <i>AT4G12500</i> | pEARLI1-like lipid transfer protein 3            |                      | 5.21 |
| TRINITY_DN2985_c0_g1  | <i>GRDP2</i>     | Glycine-rich domain-containing protein 2         |                      | 5.36 |
| TRINITY_DN6156_c0_g1  | <i>PKSA</i>      | Type III polyketide synthase A                   | transferase activity | 5.37 |
| TRINITY_DN13122_c1_g1 | <i>AT5G03980</i> | GDSL esterase/lipase At5g03980                   | hydrolase activity   | 5.54 |
| TRINITY_DN5909_c0_g2  | <i>BG2</i>       | Glucan endo-1,3-beta-glucosidase, acidic isoform | hydrolase activity   | 6.05 |
| TRINITY_DN6869_c0_g1  | <i>A6</i>        | Probable glucan endo-1,3-beta-glucosidase A6     | hydrolase activity   | 7.24 |

#### O4a4

#### Down

|                       |                  |                                                              |                                                           |       |
|-----------------------|------------------|--------------------------------------------------------------|-----------------------------------------------------------|-------|
| TRINITY_DN6442_c0_g1  | <i>A39</i>       | Aspartic proteinase 39                                       | hydrolase activity                                        | -5.23 |
| TRINITY_DN21412_c0_g1 | <i>NOP5-1</i>    | Probable nucleolar protein 5-1                               | RNA binding                                               | -4.39 |
| TRINITY_DN57_c0_g1    | <i>KIN10</i>     | SNF1-related protein kinase catalytic subunit<br>alpha KIN10 | ATP binding; transferase activity; protein binding        | -4.15 |
| TRINITY_DN325_c0_g1   | <i>XI-B</i>      | Myosin-8                                                     | ATP binding; protein binding; cytoskeletal motor activity | -3.97 |
| TRINITY_DN1893_c2_g1  | <i>OTU4</i>      | OVARIAN TUMOR DOMAIN-containing<br>deubiquitinating enzyme 4 | hydrolase activity                                        | -3.81 |
| TRINITY_DN3040_c0_g2  | <i>CIPK3</i>     | CBL-interacting serine/threonine-protein kinase 3            | ATP binding; transferase activity                         | -3.77 |
| TRINITY_DN2343_c4_g1  | <i>IBS1</i>      | Protein IMPAIRED IN BABA-INDUCED<br>STERILITY 1              | ATP binding; transferase activity                         | -3.72 |
| TRINITY_DN74912_c0_g3 | <i>FBL15</i>     | F-box/LRR-repeat protein 15                                  |                                                           | -3.70 |
| TRINITY_DN4687_c0_g1  | <i>AT5G07830</i> | Heparanase-like protein 1                                    | hydrolase activity                                        | -3.67 |
| TRINITY_DN12370_c0_g1 | <i>CSP4</i>      | Cold shock domain-containing protein 4                       | DNA binding; RNA binding; metal ion binding               | -3.66 |

#### Up

|                       |              |                                                                       |                         |      |
|-----------------------|--------------|-----------------------------------------------------------------------|-------------------------|------|
| TRINITY_DN30171_c0_g1 | <i>CCMFC</i> | Cytochrome c biogenesis CcmF C-terminal-like<br>mitochondrial protein |                         | 3.92 |
| TRINITY_DN399_c0_g3   | <i>YMF16</i> | Uncharacterized tatC-like protein ymf16                               | transporter activity    | 3.95 |
| TRINITY_DN6988_c0_g1  | <i>ND2</i>   | NADH-ubiquinone oxidoreductase chain 2                                | oxidoreductase activity | 4.06 |

|                       |                  |                                                                  |                                                                                                     |      |
|-----------------------|------------------|------------------------------------------------------------------|-----------------------------------------------------------------------------------------------------|------|
| TRINITY_DN3634_c0_g1  | <i>NAD7</i>      | NADH dehydrogenase [ubiquinone] iron-sulfur protein 2            | oxidoreductase activity; quinone binding; NAD binding                                               | 4.08 |
| TRINITY_DN1810_c1_g1  | <i>PSBI</i>      | Photosystem II reaction center protein I                         |                                                                                                     | 4.16 |
| TRINITY_DN1446_c1_g1  | <i>PSAA</i>      | Photosystem I P700 chlorophyll a apoprotein A1                   | metal cluster binding; metal ion binding; chlorophyll binding; RNA binding; oxidoreductase activity | 4.31 |
| TRINITY_DN4450_c0_g2  | <i>CCMB</i>      | Putative cytochrome c biogenesis ccmB-like mitochondrial protein | transporter activity                                                                                | 4.34 |
| TRINITY_DN2890_c1_g1  | <i>RPL14A</i>    | 60S ribosomal protein L14-1                                      | RNA binding; structural constituent of ribosome                                                     | 4.38 |
| TRINITY_DN13463_c1_g4 | <i>RBCL</i>      | Ribulose biphosphate carboxylase large chain                     | metal ion binding; oxidoreductase activity; RNA binding; lyase activity                             | 4.71 |
| TRINITY_DN979_c1_g1   | <i>ATMG00030</i> | Uncharacterized mitochondrial protein<br>AtMg00030               |                                                                                                     | 4.71 |

---
