# Supplementary material for: Ovule Transcriptome Analysis Discloses Deregulation of Genes and Pathways in Sexual and Apomictic Limonium Species (Plumbaginaceae)
Source: MDPI journal article supplement (doi:10.3390/genes14040901), 2023-04-12
Supplement: s1 [file s1]

**Table S4.** Uniquely annotated top down- and up-regulate differentially expressed genes (DEGs) in ovules from apomictic *Limonium multiflorum* in S1 relative to *L. dodartii* in S4 (**M2d4**). DEGs were annotated according to the *Arabidopsis thaliana* reference genome and are presented in ascending order of log<sub>2</sub> fold-change (log<sub>2</sub>FC).

| Gene ID                | Gene Name       | Protein Name                                    | Molecular Function                                                              | Log <sub>2</sub> FC |
|------------------------|-----------------|-------------------------------------------------|---------------------------------------------------------------------------------|---------------------|
| <b>Down-regulated</b>  |                 |                                                 |                                                                                 |                     |
| TRINITY_DN194159_c0_g1 | <i>ALDH10A8</i> | Betaine aldehyde dehydrogenase 1, chloroplastic | oxidoreductase activity                                                         | -5.91               |
| TRINITY_DN6424_c0_g1   | <i>HEL</i>      | Hevein-like preproprotein                       | chitin binding; hydrolase activity                                              | -5.78               |
| TRINITY_DN11809_c0_g1  | <i>HSP70-2</i>  | Heat shock 70 kDa protein 2                     | ATP-dependent activity; ATP binding; protein binding; protein folding chaperone | -5.55               |
| TRINITY_DN2532_c0_g2   | <i>FOX5</i>     | Berberine bridge enzyme-like 7                  | FAD binding; oxidoreductase activity                                            | -5.38               |
| TRINITY_DN2544_c0_g1   | <i>KTI5</i>     | Kunitz trypsin inhibitor 5                      | hydrolase activity                                                              | -5.19               |
| TRINITY_DN16670_c0_g2  | <i>RPS4</i>     | Ribosomal protein S4, mitochondrial             | RNA binding; structural constituent of ribosome                                 | -5.18               |
| TRINITY_DN9541_c0_g1   | <i>RPS5B</i>    | 40S ribosomal protein S5-2                      | RNA binding; structural constituent of ribosome                                 | -5.13               |
| TRINITY_DN656_c0_g1    | <i>RPS3AB</i>   | 40S ribosomal protein S3a-2                     | RNA binding; structural constituent of ribosome                                 | -5.11               |
| TRINITY_DN3634_c0_g3   | <i>PETA</i>     | Cytochrome f                                    | oxidoreductase activity; heme binding; ion binding; RNA binding                 | -5.01               |
| TRINITY_DN14609_c0_g1  | <i>EIF4A3</i>   | Eukaryotic initiation factor 4A-III homolog     | ATP binding; RNA binding; RNA helicase activity                                 | -4.97               |
| <b>Up-regulated</b>    |                 |                                                 |                                                                                 |                     |
| TRINITY_DN12965_c2_g1  | <i>CYP81D11</i> | Cytochrome P450 81D11                           | heme binding; ion binding; oxidoreductase activity                              | 3.15                |
| TRINITY_DN13513_c0_g1  | <i>DTX45</i>    | Protein DETOXIFICATION 45, chloroplastic        | transporter activity                                                            | 3.30                |
| TRINITY_DN40337_c0_g2  | <i>ARAC2</i>    | Rac-like GTP-binding protein ARAC2              | hydrolase activity; GTP binding; protein binding                                | 3.36                |
| TRINITY_DN11327_c0_g1  | <i>FDM3</i>     | Factor of DNA methylation 3                     |                                                                                 | 3.41                |

|                       |                 |                                                      |                                                    |      |
|-----------------------|-----------------|------------------------------------------------------|----------------------------------------------------|------|
| TRINITY_DN82144_c0_g1 | <i>GLN2</i>     | Glutamine synthetase,<br>chloroplastic/mitochondrial | ATP binding; ligase activity; RNA binding          | 3.44 |
| TRINITY_DN12987_c0_g1 | <i>PIN5</i>     | Auxin efflux carrier component 5                     |                                                    | 3.48 |
| TRINITY_DN13321_c0_g2 | <i>CYP71B14</i> | Cytochrome P450 71B14                                | heme binding; ion binding; oxidoreductase activity | 4.65 |
| TRINITY_DN31216_c0_g1 | <i>RL6</i>      | Protein RADIALIS-like 6                              | transcription regulator activity                   | 4.83 |
| TRINITY_DN29738_c0_g1 | <i>SMO2-2</i>   | Methylsterol monooxygenase 2-2                       | ion binding; oxidoreductase activity               | 4.93 |
| TRINITY_DN13356_c0_g1 | <i>HGO</i>      | Homogentisate 1,2-dioxygenase                        | oxidoreductase activity; ion binding               | 8.57 |

---
