# Supplementary material for: Ovule Transcriptome Analysis Discloses Deregulation of Genes and Pathways in Sexual and Apomictic Limonium Species (Plumbaginaceae)
Source: MDPI journal article supplement (doi:10.3390/genes14040901), 2023-04-12
Supplement: s1 [file s1]

**Table S6.** Uniquely annotated top down- and up-regulated differentially expressed genes (DEGs) in ovules from apomictic *Limonium auriculifolium* (A) in stage S2 (2) relative to S1 (1), and DEGs from ovules in stage S3/S4 (4) relative to either S1 (1) or S2 (2). DEGs were annotated according to the *Arabidopsis thaliana* reference genome and are presented in ascending order of log<sub>2</sub> fold-change (Log<sub>2</sub>FC).

| Gene ID                | Gene Name         | Protein Name                                                  | Molecular Function                                                                 | Log <sub>2</sub> FC |
|------------------------|-------------------|---------------------------------------------------------------|------------------------------------------------------------------------------------|---------------------|
| <b>A2a1</b>            |                   |                                                               |                                                                                    |                     |
| <b>Down-regulated</b>  |                   |                                                               |                                                                                    |                     |
| TRINITY_DN8876_c0_g1   | <i>AT2G27360</i>  | GDSL esterase/lipase At2g27360                                | hydrolase activity                                                                 | -5.85               |
| TRINITY_DN11184_c0_g1  | <i>AT4G12500</i>  | pEARLI1-like lipid transfer protein 3                         |                                                                                    | -5.46               |
| TRINITY_DN31196_c0_g1  | <i>SBT5.4</i>     | Subtilisin-like protease SBT5.4                               | hydrolase activity                                                                 | -5.38               |
| TRINITY_DN604_c0_g1    | <i>AT5G45950</i>  | GDSL esterase/lipase At5g45950                                | hydrolase activity                                                                 | -5.25               |
| TRINITY_DN14059_c0_g1  | <i>AT4G28780</i>  | GDSL esterase/lipase At4g28780                                | hydrolase activity                                                                 | -5.24               |
| TRINITY_DN2678_c0_g2   | <i>S-ACP-DES1</i> | Stearoyl-[acyl-carrier-protein] 9-desaturase 1, chloroplastic | oxidoreductase activity; ion binding                                               | -5.00               |
| TRINITY_DN1473_c0_g1   | <i>PRE6</i>       | Transcription factor PRE6                                     | protein binding                                                                    | -4.87               |
| TRINITY_DN5904_c0_g1   | <i>AT4G00165</i>  | Putative lipid-binding protein At4g00165                      |                                                                                    | -4.63               |
| TRINITY_DN664_c0_g1    | <i>FACT</i>       | Fatty alcohol:caffeoyl-CoA acyltransferase                    | DNA binding; transcription regulator activity; protein binding; chromatine binding | -4.59               |
| TRINITY_DN166369_c0_g1 | <i>UGT89A2</i>    | UDP-glycosyltransferase 89A2                                  | transferase activity                                                               | -4.44               |
| <b>Up-regulated</b>    |                   |                                                               |                                                                                    |                     |
| TRINITY_DN7650_c0_g1   | <i>VTE5</i>       | Phytol kinase 1, chloroplastic                                | transferase activity                                                               | 2.80                |
| TRINITY_DN5906_c1_g1   | <i>AT2G35920</i>  | DExH-box ATP-dependent RNA helicase DExH1                     | ATP binding; hydrolase activity; RNA binding; helicase activity                    | 2.81                |
| TRINITY_DN41534_c0_g1  | <i>UGT73C7</i>    | UDP-glycosyltransferase 73C7                                  | transferase activity                                                               | 2.84                |

|                       |                  |                                                         |                                                                        |      |
|-----------------------|------------------|---------------------------------------------------------|------------------------------------------------------------------------|------|
| TRINITY_DN2871_c0_g1  | <i>AT5G11130</i> | Probable glycosyltransferase At5g11130                  | transferase activity                                                   | 2.87 |
| TRINITY_DN51734_c0_g2 | <i>LTP11</i>     | Non-specific lipid-transfer protein 11                  | lipid binding                                                          | 2.89 |
| TRINITY_DN1055_c0_g1  | <i>AT2G04020</i> | GDSE esterase/lipase At2g04020                          | hydrolase activity                                                     | 3.05 |
| TRINITY_DN7962_c0_g1  | <i>PAT1</i>      | Anthranilate phosphoribosyltransferase, chloroplastic   | transferase activity                                                   | 3.08 |
| TRINITY_DN13463_c1_g4 | <i>RBCL</i>      | Ribulose biphosphate carboxylase large chain            | ion binding; oxidoreductase activity; RNA binding; lyase activity      | 3.30 |
| TRINITY_DN1806_c0_g2  | <i>NDHH</i>      | NAD(P)H-quinone oxidoreductase subunit H, chloroplastic | NAD binding; oxidoreductase activity                                   | 3.31 |
| TRINITY_DN5157_c0_g3  | <i>PSBC</i>      | Photosystem II CP43 reaction center protein             | chlorophyll binding; oxidoreductase activity; ion binding; RNA binding | 3.65 |

#### A4a1

#### Down-regulated

|                        |                  |                                        |                                                       |       |
|------------------------|------------------|----------------------------------------|-------------------------------------------------------|-------|
| TRINITY_DN28591_c0_g1  | <i>UGT84B1</i>   | UDP-glycosyltransferase 84B1           | transferase activity                                  | -4.85 |
| TRINITY_DN7605_c3_g1   | <i>UBQ11</i>     | Polyubiquitin 11                       | RNA binding; protein tag; protein binding             | -4.80 |
| TRINITY_DN184396_c0_g1 | <i>AT1G56220</i> | Dormancy-associated protein homolog 3  |                                                       | -4.65 |
| TRINITY_DN51734_c0_g2  | <i>LTP11</i>     | Non-specific lipid-transfer protein 11 | lipid binding                                         | -4.25 |
| TRINITY_DN166189_c1_g1 | <i>LTP1</i>      | Non-specific lipid-transfer protein 1  | protein binding; lipid binding                        | -4.25 |
| TRINITY_DN105307_c0_g1 | <i>PDF2.3</i>    | Defensin-like protein 1                |                                                       | -4.17 |
| TRINITY_DN4240_c0_g1   | <i>LSU2</i>      | Protein RESPONSE TO LOW SULFUR 2       |                                                       | -4.11 |
| TRINITY_DN45272_c0_g1  | <i>HPD</i>       | 4-hydroxyphenylpyruvate dioxygenase    | oxidoreductase activity; protein binding; ion binding | -3.95 |
| TRINITY_DN5744_c0_g1   | <i>PP2A2</i>     | Protein PHLOEM PROTEIN 2-LIKE A2       |                                                       | -3.75 |
| TRINITY_DN16864_c1_g1  | <i>EXO</i>       | Protein EXORDIUM                       |                                                       | -3.46 |

#### Up-regulated

|                       |                  |                                                      |                                          |      |
|-----------------------|------------------|------------------------------------------------------|------------------------------------------|------|
| TRINITY_DN10706_c0_g1 | <i>AT2G17570</i> | Dehydrodolichyl diphosphate synthase 6               | transferase activity                     | 3.56 |
| TRINITY_DN31379_c0_g1 | <i>TKPR1</i>     | Tetraketide alpha-pyrone reductase 1                 | oxidoreductase activity                  | 3.68 |
| TRINITY_DN44687_c0_g1 | <i>ADPG2</i>     | Polygalacturonase ADPG2                              | hydrolase activity                       | 3.78 |
| TRINITY_DN6156_c0_g1  | <i>PKSA</i>      | Type III polyketide synthase A                       | transferase activity                     | 3.84 |
| TRINITY_DN6869_c0_g1  | <i>A6</i>        | Probable glucan endo-1,3-beta-glucosidase A6         | hydrolase activity                       | 4.03 |
| TRINITY_DN9952_c0_g1  | <i>ABCG26</i>    | ABC transporter G family member 26                   | ATP binding; transporter activity        | 4.12 |
| TRINITY_DN22852_c0_g1 | <i>TA1</i>       | Short-chain dehydrogenase reductase ATA1             | oxidoreductase activity; protein binding | 4.38 |
| TRINITY_DN3406_c2_g2  | <i>XTH22</i>     | Xyloglucan endotransglucosylase/hydrolase protein 22 | hydrolase activity; transferase activity | 4.39 |
| TRINITY_DN45712_c0_g1 | <i>FAR2</i>      | Fatty acyl-CoA reductase 2, chloroplastic            | oxidoreductase activity                  | 4.58 |
| TRINITY_DN6357_c0_g1  | <i>PR5K</i>      | PR5-like receptor kinase                             | ATP binding; transferase activity        | 5.18 |

#### A2a2

#### Down-regulated

|                        |                  |                                        |                                                    |       |
|------------------------|------------------|----------------------------------------|----------------------------------------------------|-------|
| TRINITY_DN51734_c0_g2  | <i>LTP11</i>     | Non-specific lipid-transfer protein 11 | lipid binding                                      | -7.16 |
| TRINITY_DN166189_c1_g1 | <i>LTP1</i>      | Non-specific lipid-transfer protein 1  | lipid binding; protein binding                     | -6.96 |
| TRINITY_DN184396_c0_g1 | <i>AT1G56220</i> | Dormancy-associated protein homolog 3  |                                                    | -6.68 |
| TRINITY_DN5744_c0_g1   | <i>PP2A2</i>     | Protein PHLOEM PROTEIN 2-LIKE A2       | ion binding; hydrolase activity                    | -6.29 |
| TRINITY_DN7605_c3_g1   | <i>UBQ11</i>     | Polyubiquitin 11                       | RNA binding; protein tag; protein binding          | -6.22 |
| TRINITY_DN28591_c0_g1  | <i>UGT84B1</i>   | UDP-glycosyltransferase 84B1           | transferase activity                               | -5.58 |
| TRINITY_DN16864_c1_g1  | <i>EXO</i>       | Protein EXORDIUM                       |                                                    | -5.55 |
| TRINITY_DN105307_c0_g1 | <i>PDF2.3</i>    | Defensin-like protein 1                |                                                    | -5.19 |
| TRINITY_DN4240_c0_g1   | <i>LSU2</i>      | Protein RESPONSE TO LOW SULFUR 2       |                                                    | -4.36 |
| TRINITY_DN35822_c0_g1  | <i>PER25</i>     | Peroxidase 25                          | heme binding; ion binding; oxidoreductase activity | -4.13 |

#### Up-regulated

|                        |                  |                                                     |                                               |      |
|------------------------|------------------|-----------------------------------------------------|-----------------------------------------------|------|
| TRINITY_DN5909_c0_g2   | <i>BG2</i>       | Glucan endo-1,3-beta-glucosidase, acidic isoform    | hydrolase activity                            | 5.33 |
| TRINITY_DN5487_c0_g1   | <i>ROPGEF12</i>  | Rop guanine nucleotide exchange factor 12           | enzyme regulator activity                     | 5.36 |
| TRINITY_DN8876_c0_g1   | <i>AT2G27360</i> | GDSL esterase/lipase At2g27360                      | hydrolase activity                            | 5.41 |
| TRINITY_DN185471_c0_g1 | <i>AT1G30350</i> | Probable pectate lyase 4                            | ion binding; lyase activity                   | 5.44 |
| TRINITY_DN11348_c0_g1  | <i>AT4G10955</i> | GDSL esterase/lipase At4g10955                      | hydrolase activity                            | 5.48 |
| TRINITY_DN2407_c1_g1   | <i>BZIP34</i>    | Basic leucine zipper 34                             | DNA binding; transcription regulator activity | 5.59 |
| TRINITY_DN12231_c0_g1  | <i>PME13</i>     | Probable pectinesterase/pectinesterase inhibitor 13 | hydrolase activity                            | 5.63 |
| TRINITY_DN193961_c0_g1 | <i>CML16</i>     | Probable calcium-binding protein CML16              | ion binding; enzyme regulator activity        | 5.86 |
| TRINITY_DN6869_c0_g1   | <i>A6</i>        | Probable glucan endo-1,3-beta-glucosidase A6        | hydrolase activity                            | 6.00 |
| TRINITY_DN6156_c0_g1   | <i>PKSA</i>      | Type III polyketide synthase A                      | transferase activity                          | 6.20 |
