# Supplementary material for: Ovule Transcriptome Analysis Discloses Deregulation of Genes and Pathways in Sexual and Apomictic Limonium Species (Plumbaginaceae)
Source: MDPI journal article supplement (doi:10.3390/genes14040901), 2023-04-12
Supplement: s1 [file s1]

**Table S3.** Uniquely annotated top down- and up-regulated differentially expressed genes (DEGs) in ovules from apomictic *Limonium multiflorum* (M) in stage S1 (1), relative to the control *L. ovalifolium* (o) ovules in either S1 (1) or S2 (2) stages, and *L. multiflorum* (M) in S2 (2) relative to *L. ovalifolium* (o) in S3/S4 (4). DEGs were annotated according to the *Arabidopsis thaliana* reference genome and are presented in ascending order of log<sub>2</sub> fold-change (log<sub>2</sub>FC).

| Gene ID               | Gene Name        | Protein Name                                 | Molecular Function                                                | Log <sub>2</sub> FC |
|-----------------------|------------------|----------------------------------------------|-------------------------------------------------------------------|---------------------|
| <b>M1o1</b>           |                  |                                              |                                                                   |                     |
| <b>Down-regulated</b> |                  |                                              |                                                                   |                     |
| TRINITY_DN5225_c0_g1  | <i>DIR1</i>      | Putative lipid-transfer protein DIR1         | lipid binding; protein binding; ion binding                       | -9.38               |
| TRINITY_DN2097_c0_g1  | <i>CYS5</i>      | Cysteine proteinase inhibitor 5              | hydrolase activity                                                | -8.32               |
| TRINITY_DN40200_c0_g1 | <i>AT5G33370</i> | GDSL esterase/lipase At5g33370               | hydrolase activity                                                | -7.96               |
| TRINITY_DN6869_c0_g1  | <i>A6</i>        | Probable glucan endo-1,3-beta-glucosidase A6 | hydrolase activity                                                | -7.57               |
| TRINITY_DN9027_c0_g1  | <i>SEP1</i>      | Developmental protein SEPALLATA 1            | transcription regulator activity; protein binding;<br>DNA binding | -7.56               |
| TRINITY_DN3934_c0_g1  | <i>AT3G07850</i> | Exopolygalacturonase clone GBGA483           | hydrolase activity                                                | -7.51               |
| TRINITY_DN9597_c0_g2  | <i>MSBPI</i>     | Membrane steroid-binding protein 1           | lipid binding                                                     | -7.45               |
| TRINITY_DN1467_c0_g1  | <i>GASA7</i>     | Gibberellin-regulated protein 7              |                                                                   | -7.43               |
| TRINITY_DN3636_c0_g1  | <i>CER1</i>      | Very-long-chain aldehyde decarbonylase CER1  | lyase activity; oxidoreductase activity; ion binding              | -7.39               |
| TRINITY_DN7672_c0_g1  | <i>LTP6</i>      | Non-specific lipid-transfer protein 6        | lipid binding                                                     | -7.20               |
| <b>Up-regulated</b>   |                  |                                              |                                                                   |                     |
| TRINITY_DN31216_c0_g1 | <i>RL6</i>       | Protein RADIALIS-like 6                      | transcription regulator activity                                  | 7.54                |
| TRINITY_DN33030_c0_g1 | <i>GSTU20</i>    | Glutathione S-transferase U20                | transferase activity; protein binding; amine<br>binding           | 7.83                |
| TRINITY_DN41214_c0_g1 | <i>ATM</i>       | Serine/threonine-protein kinase ATM          | ATP binding; DNA binding; transferase activity                    | 7.86                |
| TRINITY_DN10435_c0_g1 | <i>ERF5</i>      | Ethylene-responsive transcription factor 5   | transcription regulator activity; DNA binding                     | 7.95                |
| TRINITY_DN3975_c0_g1  | <i>IMPA4</i>     | Importin subunit alpha-4                     | molecular carrier activity; amide binding                         | 8.48                |

|                        |                  |                                                                                                  |                                                                |       |
|------------------------|------------------|--------------------------------------------------------------------------------------------------|----------------------------------------------------------------|-------|
| TRINITY_DN11080_c0_g1  | <i>DCD</i>       | Bifunctional D-cysteine desulphydrase/1-aminocyclopropane-1-carboxylate deaminase, mitochondrial |                                                                | 8.97  |
| TRINITY_DN10398_c0_g3  | <i>NUA</i>       | Nuclear-pore anchor                                                                              | structural molecule activity                                   | 9.25  |
| TRINITY_DN44488_c0_g1  | <i>PRB1</i>      | Pathogenesis-related protein 1                                                                   | hydrolase activity                                             | 10.24 |
| TRINITY_DN68_c0_g1     | <i>PRMT14</i>    | Probable histone-arginine methyltransferase 1.4                                                  | transferase activity; protein binding                          | 10.29 |
| TRINITY_DN1353_c0_g1   | <i>ALDH7B4</i>   | Aldehyde dehydrogenase family 7 member B4                                                        | oxidoreductase activity                                        | 10.89 |
| <b>M1o2</b>            |                  |                                                                                                  |                                                                |       |
| <b>Down-regulated</b>  |                  |                                                                                                  |                                                                |       |
| TRINITY_DN40200_c0_g1  | <i>AT5G33370</i> | GDSL esterase/lipase At5g33370                                                                   | hydrolase activity                                             | -8.61 |
| TRINITY_DN7779_c0_g1   | <i>AP3</i>       | Floral homeotic protein APETALA 3                                                                | transcription regulator activity; protein binding; DNA binding | -8.55 |
| TRINITY_DN185347_c0_g1 | <i>XTH2</i>      | Xyloglucan endotransglucosylase/hydrolase protein 2                                              | hydrolase activity; transferase activity                       | -8.50 |
| TRINITY_DN5730_c0_g1   | <i>PME38</i>     | Putative pectinesterase/pectinesterase inhibitor 38                                              | hydrolase activity                                             | -8.47 |
| TRINITY_DN10004_c0_g1  | <i>PME67</i>     | Probable pectinesterase 67                                                                       | hydrolase activity                                             | -8.47 |
| TRINITY_DN8621_c0_g1   | <i>AT59</i>      | Probable pectate lyase 3                                                                         | ion binding; lyase activity                                    | -8.46 |
| TRINITY_DN19789_c0_g1  | <i>AT3G01270</i> | Probable pectate lyase 7                                                                         | ion binding; lyase activity                                    | -8.46 |
| TRINITY_DN253_c1_g1    | <i>COBL10</i>    | COBRA-like protein 10                                                                            |                                                                | -8.42 |
| TRINITY_DN6307_c0_g1   | <i>BGAL14</i>    | Beta-galactosidase 14                                                                            | hydrolase activity; carbohydrate binding                       | -8.40 |
| TRINITY_DN4212_c0_g1   | <i>NOI4</i>      | Protein NOI4                                                                                     |                                                                | -8.36 |
| <b>Up-regulated</b>    |                  |                                                                                                  |                                                                |       |
| TRINITY_DN2100_c1_g3   | <i>CRK8</i>      | Cysteine-rich receptor-like protein kinase 8                                                     | ATP binding; transferase activity                              | 5.47  |
| TRINITY_DN11080_c0_g1  | <i>DCD</i>       | Bifunctional D-cysteine desulphydrase/1-aminocyclopropane-1-carboxylate deaminase, mitochondrial | ion binding; lyase activity; hydrolase activity                | 5.98  |
| TRINITY_DN6834_c1_g1   | <i>DREB1D</i>    | Dehydration-responsive element-binding protein 1D                                                | transcription regulator activity; DNA binding                  | 6.36  |

|                       |                  |                                                          |                                          |      |
|-----------------------|------------------|----------------------------------------------------------|------------------------------------------|------|
| TRINITY_DN1009_c0_g2  | <i>CRK29</i>     | Cysteine-rich receptor-like protein kinase 29            | ATP binding; transferase activity        | 6.50 |
| TRINITY_DN6838_c0_g1  | <i>DRT101</i>    | Phosphoacetylglucosamine mutase                          | ion binding; isomerase activity          | 6.62 |
| TRINITY_DN29038_c2_g2 | <i>TPS6</i>      | Alpha,alpha-trehalose-phosphate synthase [UDP-forming] 6 | transferase activity; hydrolase activity | 6.90 |
| TRINITY_DN27105_c0_g1 | <i>OFUT9</i>     | O-fucosyltransferase 9                                   | transferase activity                     | 6.93 |
| TRINITY_DN44719_c0_g1 | <i>IQM5</i>      | IQ domain-containing protein IQM5                        |                                          | 7.44 |
| TRINITY_DN31216_c0_g1 | <i>RL6</i>       | Protein RADIALIS-like 6                                  | transcription regulator activity         | 7.59 |
| TRINITY_DN3514_c2_g1  | <i>AT1G50180</i> | Putative disease resistance protein At1g50180            | ADP binding; ATP binding                 | 9.77 |

#### M2o4

#### Down-regulated

|                        |                  |                                                     |                                           |       |
|------------------------|------------------|-----------------------------------------------------|-------------------------------------------|-------|
| TRINITY_DN1473_c0_g1   | <i>PRE6</i>      | Transcription factor PRE6                           | protein binding                           | -8.52 |
| TRINITY_DN166369_c0_g1 | <i>UGT89A2</i>   | UDP-glycosyltransferase 89A2                        | transferase activity                      | -7.67 |
| TRINITY_DN3195_c0_g2   | <i>UBQ4</i>      | Polyubiquitin 4                                     | RNA binding; protein tag; protein binding | -7.65 |
| TRINITY_DN6253_c1_g1   | <i>AT2G32990</i> | Endoglucanase 11                                    | hydrolase activity                        | -7.30 |
| TRINITY_DN32294_c0_g1  | <i>A3G2XYLT</i>  | Anthocyanidin 3-O-glucoside 2"-O-xylosyltransferase | transferase activity                      | -7.03 |
| TRINITY_DN664_c0_g1    | <i>FACT</i>      | Fatty alcohol:caffeoyl-CoA acyltransferase          | transferase activity                      | -6.78 |
| TRINITY_DN3927_c0_g1   | <i>AT3G28060</i> | WAT1-related protein At3g28060                      | transporter activity                      | -6.67 |
| TRINITY_DN8876_c0_g1   | <i>AT2G27360</i> | GDSL esterase/lipase At2g27360                      | hydrolase activity                        | -6.57 |
| TRINITY_DN25451_c0_g1  | <i>AT2G14610</i> | Pathogenesis-related protein 1                      |                                           | -6.43 |
| TRINITY_DN11082_c0_g1  | <i>INT4</i>      | Inositol transporter 4                              | transporter activity                      | -6.25 |

#### Up-regulated

|                        |                  |                                                            |                                                       |       |
|------------------------|------------------|------------------------------------------------------------|-------------------------------------------------------|-------|
| TRINITY_DN344_c1_g1    | <i>AT5G13980</i> | Probable alpha-mannosidase At5g13980                       | hydrolase activity; carbohydrate binding; ion binding | 13.52 |
| TRINITY_DN175323_c0_g1 | <i>CML32</i>     | Probable calcium-binding protein CML32                     | ion binding                                           | 13.64 |
| TRINITY_DN1517_c0_g1   | <i>DHDPS2</i>    | 4-hydroxy-tetrahydrodipicolinate synthase 2, chloroplastic | lyase activity                                        | 13.73 |

|                      |                   |                                                                             |                                                                      |       |
|----------------------|-------------------|-----------------------------------------------------------------------------|----------------------------------------------------------------------|-------|
| TRINITY_DN196_c0_g1  | <i>AT4G18465</i>  | Probable pre-mRNA-splicing factor ATP-dependent RNA helicase DEAH9          | ATP binding; hydrolase activity; RNA binding; ATP-dependent activity | 13.90 |
| TRINITY_DN271_c0_g1  | <i>LRK10L-1.1</i> | LEAF RUST 10 DISEASE-RESISTANCE LOCUS RECEPTOR-LIKE PROTEIN KINASE-like 1.1 | ATP binding; transferase activity; carbohydrate binding              | 13.96 |
| TRINITY_DN9987_c1_g1 | <i>PUB7</i>       | U-box domain-containing protein 7                                           | transferase activity                                                 | 14.13 |
| TRINITY_DN5725_c0_g1 | <i>KCS11</i>      | 3-ketoacyl-CoA synthase 11                                                  | transferase activity                                                 | 14.24 |
| TRINITY_DN6909_c0_g1 | <i>UBC29</i>      | Ubiquitin-conjugating enzyme E2 29                                          | ATP binding; transferase activity                                    | 14.61 |
| TRINITY_DN9604_c0_g1 | <i>NUDT4</i>      | Nudix hydrolase 4                                                           | ion binding; hydrolase activity                                      | 15.44 |
| TRINITY_DN5744_c0_g1 | <i>PP2A2</i>      | Protein PHLOEM PROTEIN 2-LIKE A2                                            | ion binding; hydrolase activity                                      | 16.87 |

---
