# Supplementary material for: Ovule Transcriptome Analysis Discloses Deregulation of Genes and Pathways in Sexual and Apomictic Limonium Species (Plumbaginaceae)
Source: MDPI journal article supplement (doi:10.3390/genes14040901), 2023-04-12
Supplement: s1 [file s1]

**Table S2.** Uniquely annotated top down- and up-regulated differentially expressed genes (DEGs) in ovules from apomictic *Limonium multiflorum* (M) in stage S1 (1), relative to the control *L. auriculifolium* (a) ovules in either S1 (1) or S2 (2) stages, and *L. multiflorum* (M) in S2 (2) relative to *L. auriculifolium* (a) in S3/S4 (4). DEGs were annotated according to the *Arabidopsis thaliana* reference genome and are presented in ascending order of log<sub>2</sub> fold-change (log<sub>2</sub>FC).

| Gene ID                | Gene Name        | Protein Name                                                | Molecular Function                                                | Log <sub>2</sub> FC |
|------------------------|------------------|-------------------------------------------------------------|-------------------------------------------------------------------|---------------------|
| <b>M1a1</b>            |                  |                                                             |                                                                   |                     |
| <b>Down-regulated</b>  |                  |                                                             |                                                                   |                     |
| TRINITY_DN5225_c0_g1   | <i>DIR1</i>      | Putative lipid-transfer protein DIR1                        | lipid binding; protein binding; ion binding                       | -9.80               |
| TRINITY_DN40200_c0_g1  | <i>AT5G33370</i> | GDSL esterase/lipase At5g33370                              | hydrolase activity                                                | -8.88               |
| TRINITY_DN253_c1_g1    | <i>COBL10</i>    | COBRA-like protein 10                                       |                                                                   | -8.86               |
| TRINITY_DN7779_c0_g1   | <i>AP3</i>       | Floral homeotic protein APETALA 3                           | transcription regulator activity; protein binding;<br>DNA binding | -8.66               |
| TRINITY_DN8286_c0_g1   | <i>DRT100</i>    | DNA damage-repair/toleration protein DRT100                 | nucleotide binding                                                | -8.62               |
| TRINITY_DN8621_c0_g1   | <i>AT59</i>      | Probable pectate lyase 3                                    | metal ion binding; lyase activity                                 | -8.60               |
| TRINITY_DN1267_c0_g1   | <i>PEX4</i>      | Pollen-specific leucine-rich repeat extensin-like protein 4 | ATP binding; transferase activity                                 | -8.50               |
| TRINITY_DN4212_c0_g1   | <i>NOI4</i>      | Protein NOI4                                                |                                                                   | -8.47               |
| TRINITY_DN7954_c0_g1   | <i>PI</i>        | Floral homeotic protein PISTILLATA                          | transcription regulator activity; protein binding;<br>DNA binding | -8.44               |
| TRINITY_DN185471_c0_g1 | <i>AT1G30350</i> | Probable pectate lyase 4                                    | metal ion binding; lyase activity                                 | -8.37               |
| <b>Up-regulated</b>    |                  |                                                             |                                                                   |                     |
| TRINITY_DN44719_c0_g1  | <i>IQM5</i>      | IQ domain-containing protein IQM5                           |                                                                   | 7.37                |
| TRINITY_DN31216_c0_g1  | <i>RL6</i>       | Protein RADIALIS-like 6                                     | transcription regulator activity                                  | 7.52                |
| TRINITY_DN36508_c0_g1  | <i>WRKY53</i>    | Probable WRKY transcription factor 53                       | transcription regulator activity; DNA binding                     | 7.62                |

|                       |                  |                                                     |                                                                   |       |
|-----------------------|------------------|-----------------------------------------------------|-------------------------------------------------------------------|-------|
| TRINITY_DN41214_c0_g1 | <i>ATM</i>       | Serine/threonine-protein kinase ATM                 | ATP binding; DNA binding; transferase activity                    | 7.84  |
| TRINITY_DN38061_c0_g1 | <i>ZFP8</i>      | Zinc finger protein 8                               | transcription regulator activity; ion binding;<br>DNA binding     | 8.04  |
| TRINITY_DN35799_c0_g1 | <i>MSL4</i>      | Mechanosensitive ion channel protein 4              | transporter activity                                              | 8.44  |
| TRINITY_DN13495_c0_g1 | <i>AT2G23090</i> | Uncharacterized protein At2g23090                   |                                                                   | 9.13  |
| TRINITY_DN28989_c0_g1 | <i>WAKL13</i>    | Putative wall-associated receptor kinase-like 13    | ATP binding; carbohydrate binding; transferase<br>activity        | 9.50  |
| TRINITY_DN3514_c2_g1  | <i>AT1G50180</i> | Putative disease resistance protein At1g50180       | ADP binding; ATP binding                                          | 9.69  |
| TRINITY_DN44488_c0_g1 | <i>PRB1</i>      | Pathogenesis-related protein 1                      |                                                                   | 10.21 |
| <b>M1a2</b>           |                  |                                                     |                                                                   |       |
| <b>Down-regulated</b> |                  |                                                     |                                                                   |       |
| TRINITY_DN40200_c0_g1 | <i>AT5G33370</i> | GDSL esterase/lipase At5g33370                      | hydrolase activity                                                | -7.61 |
| TRINITY_DN4445_c0_g1  | <i>CEP1</i>      | KDEL-tailed cysteine endopeptidase CEP1             | hydrolase activity                                                | -7.42 |
| TRINITY_DN19789_c0_g1 | <i>AT3G01270</i> | Probable pectate lyase 7                            |                                                                   | -7.32 |
| TRINITY_DN9597_c0_g2  | <i>MSBP1</i>     | Membrane steroid-binding protein 1                  | lipid binding                                                     | -7.30 |
| TRINITY_DN9027_c0_g3  | <i>AP1</i>       | Floral homeotic protein APETALA 1                   | DNA binding; transcription regulator activity;<br>protein binding | -7.24 |
| TRINITY_DN22841_c0_g1 | <i>PXG4</i>      | Probable peroxygenase 4                             | ion binding; oxidoreductase activity                              | -7.14 |
| TRINITY_DN5730_c0_g1  | <i>PME38</i>     | Putative pectinesterase/pectinesterase inhibitor 38 |                                                                   | -7.12 |
| TRINITY_DN9027_c0_g1  | <i>SEP1</i>      | Developmental protein SEPALLATA 1                   |                                                                   | -7.09 |
| TRINITY_DN3934_c0_g1  | <i>AT3G07850</i> | Exopolygalacturonase clone GBGA483                  |                                                                   | -6.94 |
| TRINITY_DN8621_c0_g1  | <i>AT59</i>      | Probable pectate lyase 3                            |                                                                   | -6.91 |
| <b>Up-regulated</b>   |                  |                                                     |                                                                   |       |

|                       |                  |                                                        |                                                                             |       |
|-----------------------|------------------|--------------------------------------------------------|-----------------------------------------------------------------------------|-------|
| TRINITY_DN32666_c0_g1 | <i>ARI8</i>      | Probable E3 ubiquitin-protein ligase ARI8              |                                                                             | 8.40  |
| TRINITY_DN17343_c0_g1 | <i>MYB63</i>     | Transcription factor MYB63                             |                                                                             | 8.44  |
| TRINITY_DN42433_c0_g1 | <i>CRK32</i>     | Putative cysteine-rich receptor-like protein kinase 32 |                                                                             | 8.78  |
| TRINITY_DN7799_c0_g1  | <i>AT1G06650</i> | 1-aminocyclopropane-1-carboxylate oxidase homolog 3    |                                                                             | 8.93  |
| TRINITY_DN13495_c0_g1 | <i>AT2G23090</i> | Uncharacterized protein At2g23090                      | metal cluster binding; oxidoreductase activity;<br>FAD binding; ion binding | 9.12  |
| TRINITY_DN6834_c1_g1  | <i>DREB1D</i>    | Dehydration-responsive element-binding protein 1D      | DNA binding; transcription regulator activity;<br>protein binding           | 9.31  |
| TRINITY_DN40977_c0_g1 | <i>ATG8C</i>     | Autophagy-related protein 8c                           |                                                                             | 9.52  |
| TRINITY_DN4104_c0_g2  | <i>LAC3</i>      | Laccase-3                                              | ion binding; oxidoreductase activity                                        | 9.93  |
| TRINITY_DN44488_c0_g1 | <i>PRB1</i>      | Pathogenesis-related protein 1                         | hydrolase activity                                                          | 10.21 |
| TRINITY_DN68_c0_g1    | <i>PRMT14</i>    | Probable histone-arginine methyltransferase 1.4        | transferase activity; protein binding                                       | 10.27 |

#### M2a4

#### Down-regulated

|                       |           |                                                     |                                               |       |
|-----------------------|-----------|-----------------------------------------------------|-----------------------------------------------|-------|
| TRINITY_DN1473_c0_g1  | PRE6      | Transcription factor PRE6                           | isomerase activity                            | -8.30 |
| TRINITY_DN11282_c0_g2 | IAA7      | Auxin-responsive protein IAA7                       | DNA binding; transcription regulator activity | -7.13 |
| TRINITY_DN3927_c0_g1  | AT3G28060 | WAT1-related protein At3g28060                      | transporter activity                          | -6.62 |
| TRINITY_DN8876_c0_g1  | AT2G27360 | GDSL esterase/lipase At2g27360                      | hydrolase activity                            | -6.62 |
| TRINITY_DN5904_c0_g1  | AT4G00165 | Putative lipid-binding protein At4g00165            |                                               | -6.41 |
| TRINITY_DN44687_c0_g1 | ADPG2     | Polygalacturonase ADPG2                             |                                               | -6.02 |
| TRINITY_DN6357_c0_g1  | PR5K      | PR5-like receptor kinase                            |                                               | -5.95 |
| TRINITY_DN9702_c0_g1  | JMT       | Jasmonate O-methyltransferase                       |                                               | -5.72 |
| TRINITY_DN8238_c0_g2  | AT3G03770 | Probable inactive leucine-rich repeat receptor-like |                                               | -5.70 |

|                        |                  |                                                       |                                                       |       |
|------------------------|------------------|-------------------------------------------------------|-------------------------------------------------------|-------|
|                        |                  | protein kinase At3g03770                              |                                                       |       |
| TRINITY_DN40496_c0_g1  | AT1G04350        | 1-aminocyclopropane-1-carboxylate oxidase homolog 6   |                                                       | -5.65 |
| <b>Up-regulated</b>    |                  |                                                       |                                                       |       |
| TRINITY_DN209_c0_g2    | <i>ATX5</i>      | Histone-lysine N-methyltransferase ATX5               |                                                       | 7.64  |
| TRINITY_DN35748_c1_g1  | <i>LOV1</i>      | Putative inactive disease susceptibility protein LOV1 |                                                       | 7.65  |
| TRINITY_DN38698_c0_g1  | <i>BSL1</i>      | Serine/threonine-protein phosphatase BSL1             |                                                       | 7.69  |
| TRINITY_DN28687_c0_g1  | <i>GOLS4</i>     | Galactinol synthase 4                                 |                                                       | 7.76  |
| TRINITY_DN40624_c0_g1  | <i>CAT2</i>      | Catalase-2                                            |                                                       | 7.92  |
| TRINITY_DN5170_c0_g1   | <i>AT4G16820</i> | Phospholipase A1-Ibeta2, chloroplastic                |                                                       | 8.16  |
| TRINITY_DN14944_c1_g1  | <i>AT1G78910</i> | RNA pseudouridine synthase 3, mitochondrial           |                                                       | 8.30  |
| TRINITY_DN39320_c0_g1  | <i>NPF7.3</i>    | Protein NRT1/ PTR FAMILY 7.3                          | transporter activity                                  | 9.38  |
| TRINITY_DN6834_c1_g1   | <i>DREB1D</i>    | Dehydration-responsive element-binding protein 1D     | DNA binding; transcription regulator activity         | 9.79  |
| TRINITY_DN137553_c0_g1 | <i>CLPC1</i>     | Chaperone protein ClpC1, chloroplastic                | ATP binding; hydrolase activity; nucleic acid binding | 12.35 |
