# Supplementary material for: Ovule Transcriptome Analysis Discloses Deregulation of Genes and Pathways in Sexual and Apomictic Limonium Species (Plumbaginaceae)
Source: MDPI journal article supplement (doi:10.3390/genes14040901), 2023-04-12
Supplement: s1 [file s1]

**Table S5.** Uniquely annotated top down- and up-regulate differentially expressed genes (DEGs) in ovules from apomictic *Limonium multiflorum* in stage S2 relative to S1 (**M2m1**). DEGs were annotated according to the *Arabidopsis thaliana* reference genome and are presented in ascending order of log<sub>2</sub> fold-change (Log<sub>2</sub>FC).

| Gene ID                | Gene Name        | Protein Name                                      | Molecular Function                                                     | Log <sub>2</sub> FC |
|------------------------|------------------|---------------------------------------------------|------------------------------------------------------------------------|---------------------|
| <b>Down-regulated</b>  |                  |                                                   |                                                                        |                     |
| TRINITY_DN38876_c0_g1  | <i>AT4G13710</i> | Probable pectate lyase 15                         | hydrolase activity; ion binding                                        | -4.61               |
| TRINITY_DN11052_c0_g1  | <i>AT5G37690</i> | GDSL esterase/lipase At5g37690                    | hydrolase activity                                                     | -4.04               |
| TRINITY_DN25592_c0_g1  | <i>PCO2</i>      | Plant cysteine oxidase 2                          | oxidoreductase activity; ion binding                                   | -3.43               |
| TRINITY_DN10225_c0_g1  | <i>AT2G23540</i> | GDSL esterase/lipase At2g23540                    | hydrolase activity                                                     | -3.34               |
| TRINITY_DN4104_c0_g2   | <i>LAC3</i>      | Laccase-3                                         | oxidoreductase activity; ion binding                                   | -3.20               |
| TRINITY_DN4536_c0_g1   | <i>GLP6</i>      | Germin-like protein subfamily 1 member 13         | ion binding                                                            | -2.81               |
| TRINITY_DN17736_c0_g1  | <i>GASA1</i>     | Gibberellin-regulated protein 1                   |                                                                        | -2.53               |
| TRINITY_DN5560_c0_g4   | <i>CYP86A1</i>   | Cytochrome P450 86A1                              | oxidoreductase activity; ion binding; heme binding                     | -2.45               |
| <b>Up-regulated</b>    |                  |                                                   |                                                                        |                     |
| TRINITY_DN157181_c0_g1 | <i>RPL17B</i>    | 60S ribosomal protein L17-2                       | RNA binding; structural constituent of ribosome                        | 7.16                |
| TRINITY_DN156733_c0_g1 | <i>DREB2D</i>    | Dehydration-responsive element-binding protein 2D | transcription regulator activity; DNA binding                          | 7.16                |
| TRINITY_DN39230_c0_g1  | <i>RPL7C</i>     | 60S ribosomal protein L7-3                        | RNA binding; structural constituent of ribosome                        | 7.26                |
| TRINITY_DN28291_c0_g2  | <i>AGL15</i>     | Agamous-like MADS-box protein AGL15               | transcription regulator activity; DNA binding; protein binding         | 7.30                |
| TRINITY_DN43442_c0_g1  | <i>RTNLB8</i>    | Reticulon-like protein B8                         |                                                                        | 7.31                |
| TRINITY_DN2342_c1_g1   | <i>AHA5</i>      | ATPase 5, plasma membrane-type                    | ATP-dependent activity; ATP binding; transporter activity; ion binding | 7.35                |
| TRINITY_DN6665_c0_g1   | <i>AT5G08670</i> | ATP synthase subunit beta-1, mitochondrial        | ATP-dependent activity; ATP binding; transporter activity              | 7.62                |

|                       |                  |                                             |                                                                  |      |
|-----------------------|------------------|---------------------------------------------|------------------------------------------------------------------|------|
| TRINITY_DN4687_c0_g1  | <i>AT5G07830</i> | Heparanase-like protein 1                   | hydrolase activity                                               | 7.88 |
| TRINITY_DN40215_c0_g1 | <i>CYP18-3</i>   | Peptidyl-prolyl cis-trans isomerase CYP18-3 | protein binding; isomerase activity                              | 8.00 |
| TRINITY_DN9971_c0_g1  | <i>MYB80</i>     | Transcription factor MYB80                  | chromatin binding; transcription regulator activity; DNA binding | 8.81 |

---
