# Supplementary material for: Ovule Transcriptome Analysis Discloses Deregulation of Genes and Pathways in Sexual and Apomictic Limonium Species (Plumbaginaceae)
Source: MDPI journal article supplement (doi:10.3390/genes14040901), 2023-04-12
Supplement: s1 [file s1]

**Table S1.** Quantification of basic quality and completeness metrics of *Limonium de novo* transcriptome assembly. Samples of apomictic (*L. multiflorum*), facultative apomictic (*L. dodartii*), sexual (*L. ovalifolium*, *L. auricolifolium*) in S1, S2, S1/S2, S3/S4 and S4 stages were combined to perform a *de novo* transcriptome assembly using Trinity software's.

| Basic Metrics                                           | Values                                     |
|---------------------------------------------------------|--------------------------------------------|
| Total trinity unigenes                                  | 162520                                     |
| Total trinity transcripts (isoforms)                    | 315983                                     |
| Percent GC (%)                                          | 42.94                                      |
| Contig N10                                              | 4592                                       |
| Contig N20                                              | 3604                                       |
| Contig N30                                              | 2998                                       |
| Contig N40                                              | 2528                                       |
| Contig N50                                              | 2128                                       |
| <b>Completeness</b>                                     |                                            |
| Total number of core genes queried                      | 2326                                       |
| Number of core genes detected                           |                                            |
| Complete                                                | 2090 (89.85%)                              |
| Complete + Partial                                      | 2159 (92.82%)                              |
| Number of missing core genes                            | 167 (7.18%)                                |
| Average number of orthologs per core gene               | 2.93                                       |
| % of detected core genes that have more than 1 ortholog | 70.81                                      |
| Scores in BUSCO format                                  | C:89.8% [S:26.2%, D:63.6%], F:3.0%, M:7.2% |
