# Supplementary material for: Ovule Transcriptome Analysis Discloses Deregulation of Genes and Pathways in Sexual and Apomictic Limonium Species (Plumbaginaceae)
Source: MDPI journal article supplement (doi:10.3390/genes14040901), 2023-04-12
Supplement: s1 [file s1]

**Table S7.** Uniquely annotated top down- and up-regulate differentially expressed genes (DEGs) in ovules from apomictic *Limonium ovalifolium* (O) in stage S2 (2) relative to S1 (1) and DEGs from stage S3/S4 (4) relative to either S1 (1) or S2 (2). DEGs were annotated according to the *Arabidopsis thaliana* reference genome and are presented in ascending order of log<sub>2</sub> fold-change (Log<sub>2</sub>FC).

| Gene ID                | Gene Name        | Protein Name                                                                 | Molecular Function                                                                | Log <sub>2</sub> FC |
|------------------------|------------------|------------------------------------------------------------------------------|-----------------------------------------------------------------------------------|---------------------|
| <b>O2o1</b>            |                  |                                                                              |                                                                                   |                     |
| <b>Down</b>            |                  |                                                                              |                                                                                   |                     |
| TRINITY_DN166189_c1_g1 | <i>LTP1</i>      | Non-specific lipid-transfer protein 1                                        | protein binding; lipid binding                                                    | -3,53               |
| TRINITY_DN51734_c0_g2  | <i>LTP11</i>     | Non-specific lipid-transfer protein 11                                       | lipid binding                                                                     | -3,31               |
| TRINITY_DN16864_c1_g1  | <i>EXO</i>       | Protein EXORDIUM                                                             |                                                                                   | -3,05               |
| TRINITY_DN2317_c0_g2   | <i>GA2OX6</i>    | Gibberellin 2-beta-dioxygenase 6                                             | metal ion binding; oxidoreductase activity                                        | -2,82               |
| TRINITY_DN5744_c0_g1   | <i>PP2A2</i>     | Protein PHLOEM PROTEIN 2-LIKE A2                                             | ion binding; hydrolase activity                                                   | -2,71               |
| TRINITY_DN9463_c0_g1   | <i>EMI</i>       | Em-like protein GEA1                                                         |                                                                                   | -2,52               |
| TRINITY_DN79538_c1_g1  | <i>COL1</i>      | Zinc finger protein CONSTANS-LIKE 1                                          | transcription regulator activity; metal ion binding; DNA binding; protein binding | -2,41               |
| TRINITY_DN89174_c0_g1  | <i>FQR1</i>      | NAD(P)H dehydrogenase (quinone) FQR1                                         | ribonucleotide binding; oxidoreductase activity                                   | -2,35               |
| TRINITY_DN7605_c3_g1   | <i>UBQ11</i>     | Polyubiquitin 11                                                             | RNA binding; protein tag; protein binding                                         | -2,31               |
| TRINITY_DN13979_c0_g2  |                  | Probable inactive nicotinamidase At3g16190                                   |                                                                                   | -2,3                |
| <b>Up</b>              |                  |                                                                              |                                                                                   |                     |
| TRINITY_DN19440_c0_g1  | <i>PELPK1</i>    | Protein PELPK1                                                               |                                                                                   | 3,99                |
| TRINITY_DN150733_c0_g1 | <i>TBL31</i>     | Protein trichome birefringence-like 31                                       | transferase activity                                                              | 4,06                |
| TRINITY_DN829_c0_g2    | <i>INVA</i>      | Alkaline/neutral invertase A, mitochondrial                                  | hydrolase activity                                                                | 4,24                |
| TRINITY_DN8876_c0_g1   | <i>AT2G27360</i> | GDGL esterase/lipase At2g27360                                               | hydrolase activity                                                                | 4,27                |
| TRINITY_DN8238_c0_g2   | <i>AT3G03770</i> | Probable inactive leucine-rich repeat receptor-like protein kinase At3g03770 | ATP binding; transferase activity                                                 | 4,36                |

|                       |                  |                                          |                    |      |
|-----------------------|------------------|------------------------------------------|--------------------|------|
| TRINITY_DN4747_c0_g1  | <i>EXPB3</i>     | Expansin-B3                              |                    | 4,37 |
| TRINITY_DN14059_c0_g1 | <i>AT4G28780</i> | GDSL esterase/lipase At4g28780           | hydrolase activity | 4,38 |
| TRINITY_DN1473_c0_g1  | <i>PRE6</i>      | Transcription factor PRE6                | protein binding    | 4,51 |
| TRINITY_DN604_c0_g1   | <i>AT5G45950</i> | GDSL esterase/lipase At5g45950           | hydrolase activity | 5,73 |
| TRINITY_DN5904_c0_g1  | <i>AT4G00165</i> | Putative lipid-binding protein At4g00165 |                    | 5,82 |

---

#### O4o1

---

#### Down

---

|                       |               |                                                           |                                                                  |       |
|-----------------------|---------------|-----------------------------------------------------------|------------------------------------------------------------------|-------|
| TRINITY_DN51734_c0_g2 | <i>LTP11</i>  | Non-specific lipid-transfer protein 11                    | lipid binding                                                    | -5,12 |
| TRINITY_DN57_c0_g1    | <i>KIN10</i>  | SNF1-related protein kinase catalytic subunit alpha KIN10 | ATP binding; transferase activity; protein binding               | -4,95 |
| TRINITY_DN12370_c0_g1 | <i>CSP4</i>   | Cold shock domain-containing protein 4                    | DNA binding; RNA binding; ion binding                            | -4,8  |
| TRINITY_DN325_c0_g1   | <i>XI-B</i>   | Myosin-8                                                  | ATP-dependent activity; protein binding; ATP binding             | -4,13 |
| TRINITY_DN3040_c0_g2  | <i>CIPK3</i>  | CBL-interacting serine/threonine-protein kinase 3         | ATP binding; transferase activity                                | -4,1  |
| TRINITY_DN1497_c0_g1  | <i>RAP2-4</i> | Ethylene-responsive transcription factor RAP2-4           | DNA binding; transcription regulator activity                    | -3,91 |
| TRINITY_DN8323_c0_g1  | <i>YYI</i>    | Zinc finger transcription factor YY1                      | transcription regulator activity; metal ion binding; DNA binding | -3,67 |
| TRINITY_DN3733_c0_g2  | <i>IAA18</i>  | Auxin-responsive protein IAA18                            | transcription regulator activity                                 | -3,63 |
| TRINITY_DN2881_c0_g1  | <i>NHL1</i>   | NDR1/HIN1-like protein 1                                  |                                                                  | -3,59 |
| TRINITY_DN2779_c0_g1  | <i>RPL11A</i> | 60S ribosomal protein L11-1                               | RNA binding; structural constituent of ribosome                  | -3,57 |

---

#### Up

---

|                        |              |                                                     |                      |      |
|------------------------|--------------|-----------------------------------------------------|----------------------|------|
| TRINITY_DN150733_c0_g1 | <i>TBL31</i> | Protein trichome birefringence-like 31              | transferase activity | 5,5  |
| TRINITY_DN12231_c0_g1  | <i>PME13</i> | Probable pectinesterase/pectinesterase inhibitor 13 | hydrolase activity   | 5,52 |

|                       |                  |                                                                |                                                                            |      |
|-----------------------|------------------|----------------------------------------------------------------|----------------------------------------------------------------------------|------|
| TRINITY_DN979_c1_g1   | <i>ATMG00030</i> | Uncharacterized mitochondrial protein<br>AtMg00030             |                                                                            | 5,54 |
| TRINITY_DN5904_c0_g1  | <i>AT4G00165</i> | Putative lipid-binding protein At4g00165                       |                                                                            | 5,79 |
| TRINITY_DN5664_c0_g1  | <i>ATPA</i>      | ATP synthase subunit alpha, chloroplastic                      | ADP binding; ATP binding; RNA binding; ATP-dependent activity; ion binding | 5,9  |
| TRINITY_DN1806_c0_g2  | <i>NDHH</i>      | NAD(P)H-quinone oxidoreductase subunit H, chloroplastic        | NAD binding; oxidoreductase activity; quinone binding                      | 5,94 |
| TRINITY_DN1473_c0_g1  | <i>PRE6</i>      | Transcription factor PRE6                                      | protein binding                                                            | 6,14 |
| TRINITY_DN47860_c0_g2 | <i>PSBE</i>      | Cytochrome b559 subunit alpha                                  | oxidoreductase activity; heme binding; ion binding                         | 6,62 |
| TRINITY_DN604_c0_g1   | <i>AT5G45950</i> | GDSL esterase/lipase At5g45950                                 | hydrolase activity                                                         | 6,86 |
| TRINITY_DN2730_c0_g1  | <i>CLPP1</i>     | Chloroplastic ATP-dependent Clp protease proteolytic subunit 1 | enzyme binding; ATP-dependent activity; hydrolase activity                 | 7,17 |

---

#### O4o2

---

#### Down

---

|                       |               |                                                                  |                                                      |       |
|-----------------------|---------------|------------------------------------------------------------------|------------------------------------------------------|-------|
| TRINITY_DN2467_c0_g2  | <i>XTH10</i>  | Probable xyloglucan<br>endotransglucosylase/hydrolase protein 10 | hydrolase activity; transferase activity             | -4,58 |
| TRINITY_DN57_c0_g1    | <i>KIN10</i>  | SNF1-related protein kinase catalytic subunit alpha KIN10        | ATP binding; transferase activity; protein binding   | -4,52 |
| TRINITY_DN3040_c0_g2  | <i>CIPK3</i>  | CBL-interacting serine/threonine-protein kinase 3                | transferase activity                                 | -4,42 |
| TRINITY_DN12370_c0_g1 | <i>CSP4</i>   | Cold shock domain-containing protein 4                           | DNA binding; RNA binding; ion binding                | -4,28 |
| TRINITY_DN325_c0_g1   | <i>XI-B</i>   | Myosin-8                                                         | ATP-dependent activity; protein binding; ATP binding | -4,1  |
| TRINITY_DN21412_c0_g1 | <i>NOP5-1</i> | Probable nucleolar protein 5-1                                   | RNA binding                                          | -3,87 |
| TRINITY_DN1593_c0_g1  | <i>DSE1</i>   | Protein DECREASED SIZE EXCLUSION LIMIT 1                         |                                                      | -3,7  |

|                      |               |                                                    |                                                 |       |
|----------------------|---------------|----------------------------------------------------|-------------------------------------------------|-------|
| TRINITY_DN6442_c0_g1 | <i>A39</i>    | Aspartic proteinase 39                             | hydrolase activity                              | -3,69 |
| TRINITY_DN2779_c0_g1 | <i>RPL11A</i> | 60S ribosomal protein L11-1                        | RNA binding; structural constituent of ribosome | -3,56 |
| TRINITY_DN1497_c0_g1 | <i>RAP2-4</i> | Ethylene-responsive transcription factor<br>RAP2-4 | transcription regulator activity; DNA binding   | -3,46 |

---

**Up**

---

|                       |                  |                                                                |                                                                                                  |      |
|-----------------------|------------------|----------------------------------------------------------------|--------------------------------------------------------------------------------------------------|------|
| TRINITY_DN3634_c0_g1  | <i>NAD7</i>      | NADH dehydrogenase [ubiquinone] iron-sulfur protein 2          | oxidoreductase activity; NAD binding                                                             | 5,18 |
| TRINITY_DN6988_c0_g1  | <i>ND2</i>       | NADH-ubiquinone oxidoreductase chain 2                         | oxidoreductase activity                                                                          | 5,5  |
| TRINITY_DN979_c1_g1   | <i>ATMG00030</i> | Uncharacterized mitochondrial protein<br>AtMg00030             |                                                                                                  | 5,95 |
| TRINITY_DN3643_c2_g1  | <i>YCF3</i>      | Photosystem I assembly protein Ycf3                            |                                                                                                  | 6,05 |
| TRINITY_DN5157_c0_g3  | <i>PSBC</i>      | Photosystem II CP43 reaction center protein                    | chlorophyll binding; oxidoreductase activity; ion binding; RNA binding                           | 6,23 |
| TRINITY_DN13463_c1_g4 | <i>RBCL</i>      | Ribulose biphosphate carboxylase large chain                   | ion binding; oxidoreductase activity; RNA binding; lyase activity                                | 6,23 |
| TRINITY_DN1806_c0_g2  | <i>NDHH</i>      | NAD(P)H-quinone oxidoreductase subunit H, chloroplastic        | NAD binding; oxidoreductase activity; quinone binding                                            | 6,23 |
| TRINITY_DN5664_c0_g1  | <i>ATPA</i>      | ATP synthase subunit alpha, chloroplastic                      | ADP binding; ATP binding; RNA binding; ATP-dependent activity; transporter activity; ion binding | 6,62 |
| TRINITY_DN2730_c0_g1  | <i>CLPP1</i>     | Chloroplastic ATP-dependent Clp protease proteolytic subunit 1 | protein binding; ATP-dependent activity; hydrolase activity                                      | 6,96 |
| TRINITY_DN47860_c0_g2 | <i>PSBE</i>      | Cytochrome b559 subunit alpha                                  | oxidoreductase activity; heme binding; ion binding                                               | 7,14 |

---
