# Supplementary material for: Ovule Transcriptome Analysis Discloses Deregulation of Genes and Pathways in Sexual and Apomictic Limonium Species (Plumbaginaceae)
Source: MDPI journal article supplement (doi:10.3390/genes14040901), 2023-04-12
Supplement: s1 [file s1]

**Table S9.** Over-representation analysis (ORA) performed by gProfiler of transcription factors (TFs) differentially expressed genes (DEGs) in ovules of *Limonium* plants, namely apomictic *L. multiflorum* (M) and sexual *L. auriculifolium* (a) and *L. ovalifolium* (o). DEGs were filtered by  $|\log_2 \text{fold-change} (\log_2 \text{FC})| > 2$ . *Arabidopsis thaliana* most similar homolog of each differentially expressed gene (DEG) was mapped to the respective functional annotation. Significantly (FDR < 0.01) KEGG and WikiPathways metabolic pathways and the respective DEGs from **M1a1**, **M1a2**, **M1o1**, **M1o2**, **M2a4** and **M2o4** (Red: up-regulated DEGs; blue: down-regulated DEGs).

| Gene ID                                     | Gene Name | Protein Name                                    | Log2FC |      |      |      |      |      |
|---------------------------------------------|-----------|-------------------------------------------------|--------|------|------|------|------|------|
|                                             |           |                                                 | M1a1   | M1a2 | M1o1 | M1o2 | M2a4 | M2o4 |
| Flower Development [WP:WP618]               |           |                                                 |        |      |      |      |      |      |
| TRINITY_DN6666_c0_g1                        | AG        | Floral homeotic protein AGAMOUS                 |        |      |      |      |      | -2,4 |
| TRINITY_DN9027_c0_g3                        | API       | Floral homeotic protein APETALA 1               | -7,1   | -7,2 | -7,2 | -6,3 |      |      |
| TRINITY_DN7779_c0_g1                        | AP3       | Floral homeotic protein APETALA 3               |        |      |      |      | -4,2 | -3,2 |
| TRINITY_DN7954_c0_g1                        | PI        | Floral homeotic protein PISTILLATA              | -8,4   | -6,5 | -7,1 | -8,3 |      | -3,4 |
| TRINITY_DN12350_c0_g1                       | RAP2-7    | Ethylene-responsive transcription factor RAP2-7 |        |      |      |      | -4,2 |      |
| TRINITY_DN9027_c0_g1                        | SEP1      | Developmental protein SEPALLATA 1               | -7,9   |      | -7,6 | -8,1 |      |      |
| TRINITY_DN31040_c0_g1                       | SEP3      | Developmental protein SEPALLATA 3               |        |      |      |      | -2,4 |      |
| TRINITY_DN2251_c0_g1                        | SOC1      | MADS-box protein SOC1                           |        |      |      |      |      |      |
| TRINITY_DN29363_c0_g1                       | SVP       | MADS-box protein SVP                            |        |      |      |      |      |      |
| Flower Development (Initiation) [WP:WP2108] |           |                                                 |        |      |      |      |      |      |
| TRINITY_DN6666_c0_g1                        | AG        | Floral homeotic protein AGAMOUS                 |        |      |      |      |      | -2,4 |
| TRINITY_DN9027_c0_g3                        | API       | Floral homeotic protein APETALA 1               | -7,1   | -7,2 | -7,2 | -6,3 |      |      |
| TRINITY_DN2754_c0_g1                        | AP2       | Floral homeotic protein APETALA 2               |        |      |      |      |      | 2,1  |
| TRINITY_DN7779_c0_g1                        | AP3       | Floral homeotic protein APETALA 3               |        |      |      |      | -2,5 | -3,2 |
| TRINITY_DN7954_c0_g1                        | PI        | Floral homeotic protein PISTILLATA              |        |      |      |      |      | -3,4 |
| TRINITY_DN12350_c0_g1                       | RAP2-7    | Ethylene-responsive transcription factor RAP2-7 | 6,4    |      | 6,5  | 4,6  | 4,6  |      |
| TRINITY_DN31040_c0_g1                       | SEP3      | Developmental protein SEPALLATA 3               |        |      |      |      | -2,4 |      |

| Lysine degradation [KEGG:00310]                |                  |                                                                |      |      |      |      |
|------------------------------------------------|------------------|----------------------------------------------------------------|------|------|------|------|
| TRINITY_DN8133_c0_g1                           | <i>ASHR1</i>     | Histone-lysine N-methyltransferase ASHR1                       | 10,1 |      |      |      |
| TRINITY_DN1656_c0_g1                           | <i>ATXR3</i>     | Histone-lysine N-methyltransferase ATXR3                       | 2,1  |      |      |      |
| TRINITY_DN15991_c0_g1                          | <i>ATXR5</i>     | Histone-lysine N-methyltransferase EZA1                        | 6,8  |      |      |      |
| TRINITY_DN14929_c0_g1                          | <i>EZA1</i>      | Histone-lysine N-methyltransferase EZA1                        | 2,9  |      |      |      |
| TRINITY_DN22984_c0_g1                          | <i>SUVH6</i>     | Histone-lysine N-methyltransferase, H3 lysine-9 specific SUVH6 | 7,2  |      |      |      |
| TRINITY_DN393_c0_g2                            | <i>SUVH9</i>     | Histone-lysine N-methyltransferase family member SUVH9         | 10,4 |      |      |      |
| TRINITY_DN10785_c0_g1                          | <i>SUVR3</i>     | Histone-lysine N-methyltransferase SUVR3                       | 7,1  |      |      |      |
| MAPK signaling pathway - plant [KEGG:04016]    |                  |                                                                |      |      |      |      |
| TRINITY_DN11495_c0_g1                          | <i>EIN4</i>      | Protein EIN4                                                   | 10,5 |      |      |      |
| TRINITY_DN9787_c0_g1                           | <i>AT1G66345</i> | Pentatricopeptide repeat-containing protein At1g66345          | 9,6  |      |      |      |
| TRINITY_DN7020_c3_g1                           | <i>MYC2</i>      | Transcription factor MYC2                                      | 2,6  |      |      |      |
| TRINITY_DN10939_c0_g2                          | <i>WRKY29</i>    | Probable WRKY transcription factor 29                          | 8,1  |      |      |      |
| TRINITY_DN42768_c0_g1                          | <i>WRKY33</i>    | Probable WRKY transcription factor 33                          | 2,8  |      |      |      |
| Plant hormone signal transduction [KEGG:04075] |                  |                                                                |      |      |      |      |
| TRINITY_DN5251_c0_g1                           | <i>AHK3</i>      | Histidine kinase 3                                             | 2,6  | 2,4  | 2,6  | 9,8  |
| TRINITY_DN5309_c0_g1                           | <i>AHK4</i>      | Histidine kinase 4                                             |      | -3,8 | -2,2 |      |
| TRINITY_DN106_c0_g1                            | <i>ARF1</i>      | Auxin response factor 1                                        |      |      |      | 2,7  |
| TRINITY_DN21549_c0_g1                          | <i>ARR11</i>     | Two-component response regulator ARR11                         |      |      |      | 8,3  |
| TRINITY_DN12286_c0_g1                          | <i>ARR17</i>     | Two-component response regulator ARR17                         |      |      | -4,1 |      |
| TRINITY_DN7878_c1_g2                           | <i>ARR9</i>      | Two-component response regulator ARR9                          | -2,3 | -2,4 |      | 8,6  |
| TRINITY_DN13746_c0_g1                          | <i>BZR2</i>      | Protein BRASSINAZOLE-RESISTANT 2                               |      |      |      | 7,6  |
| TRINITY_DN56546_c0_g1                          | <i>DPBF3</i>     | ABSCISIC ACID-INSENSITIVE 5-like protein 2                     |      |      |      | 6,7  |
| TRINITY_DN11495_c0_g1                          | <i>EIN4</i>      | Protein EIN4                                                   |      |      |      | 10,5 |

|                       |                  |                                                       |      |      |      |
|-----------------------|------------------|-------------------------------------------------------|------|------|------|
| TRINITY_DN5700_c2_g1  | <i>ERF2</i>      | Ethylene-responsive transcription factor 2            |      | 2,2  | 10,8 |
| TRINITY_DN9787_c0_g1  | <i>AT1G66345</i> | Pentatricopeptide repeat-containing protein At1g66345 |      |      | 9,6  |
| TRINITY_DN5071_c0_g1  | <i>GBF4</i>      | G-box-binding factor 4                                |      |      | 11,7 |
| TRINITY_DN6334_c0_g1  | <i>IAA14</i>     | Auxin-responsive protein IAA14                        | -3,4 | -2,8 |      |
| TRINITY_DN16729_c0_g1 | <i>IAA27</i>     | Auxin-responsive protein IAA27                        |      | -4,2 | -3,1 |
| TRINITY_DN243_c0_g4   | <i>IAA3</i>      | Auxin-responsive protein IAA3                         |      | -2,2 |      |
| TRINITY_DN11282_c0_g2 | <i>IAA7</i>      | Auxin-responsive protein IAA7                         |      | -7,1 | -5   |
| TRINITY_DN7020_c3_g1  | <i>MYC2</i>      | Transcription factor MYC2                             |      | 2,8  | 2,6  |
| TRINITY_DN9310_c0_g1  | <i>NPR5</i>      | Regulatory protein NPR5                               |      | -2   |      |
| TRINITY_DN2328_c0_g1  | <i>TGA1</i>      | Transcription factor TGA1                             |      |      | 11,1 |
| TRINITY_DN10239_c0_g1 | <i>TGA2</i>      | Transcription factor TGA2                             | 2,1  |      | 2,8  |
| TRINITY_DN20363_c0_g1 | <i>TGA6</i>      | Transcription factor TGA6                             |      |      | 3,1  |
