# Supplementary material for: Ovule Transcriptome Analysis Discloses Deregulation of Genes and Pathways in Sexual and Apomictic Limonium Species (Plumbaginaceae)
Source: Genes (Basel). 2023 Apr 12;14(4):901. doi: 10.3390/genes14040901 (PMC10137852; doi:10.3390/genes14040901)
Supplement: Supplementary file 1 [file genes-14-00901-s001.zip]

Archive with 14 entries (14 files):
- supplementary figure S1.jpeg
- supplementary figure S2.jpeg
- supplementary figure S3.jpeg
- supplementary figure S4.jpeg
- supplementary figure S5.jpeg
- supplementary table S2.pdf
- supplementary table S3.pdf
- supplementary table S4.pdf
- supplementary table S5.pdf
- supplementary table S6.pdf
- supplementary table S7.pdf
- supplementary table S8.pdf
- supplementary table S9.pdf
- Table_S1.pdf
